# Supplementary material
Source: publisher site journal article supplement (https://www.dovepress.com/article/413754)
Supplement: Supplementary file 1 [file get_supplementary_file.php]

**Table S1. Comparison of Inter-group Differences based on PP data for Each Outcome After Treatment**

| Outcomes | Experimental group(n=135) | Control group  (n=145) | Mean differences | 95%CI | t/*χ2/F* | P |
| --- | --- | --- | --- | --- | --- | --- |
| Annual numbers of acute exacerbation(AE)* | 0.47±0.85 | 0.83±1.23 | -0.35 | -0.61, -0.10 | -2.75 | 0.006 |
| Annual numbers of AE related hospitalization | 0.27±0.69 | 0.45±0.80 | -0.18 | -0.36, -0.01 | -2.04 | 0.04 |
| Durations of AE related hospitalizations | 1.68±3.90 | 3.48±5.67 | -1.83 | -2.97, -0.68 | -3.14 | 0.002 |
| mMRC Scores | 1.30±0.86 | 1.86±0.81 | -0.57 | -0.76, -0.37 | -5.69 | ＜0.001 |
| 6MWD—m | 416.78±92.68 | 376.35±92.43 | 40.93 | 32.03, 49.83 | 9.02 | ＜0.001 |
| Total Symptoms scores total scors | 6.33±2.35 | 8.52±3.17 | -2.18 | -2.84, -1.53 | -6.58 | ＜0.001 |
| Cough scores | 0.84±0.65 | 1.18±0.69 | -0.34 | -0.49, -0.18 | -4.17 | ＜0.001 |
| Expectoration scores | 0.94±0.52 | 1.29±0.63 | -0.35 | -0.48, -0.21 | -5.07 | ＜0.001 |
| Gasp scores | 1.23±0.61 | 1.50±0.60 | -0.27 | -0.42, -0.13 | -3.78 | ＜0.001 |
| Chest tightness scores | 0.99±0.65 | 1.26±0.74 | -0.28 | -0.44, -0.11 | -3.35 | 0.001 |
| Shortness of breath scores | 1.04±0.48 | 1.42±0.67 | -0.38 | -0.52, -0.25 | -5.52 | ＜0.001 |
| Weakness scores | 0.77±0.57 | 1.16±0.66 | -0.39 | -0.53, -0.24 | -5.23 | ＜0.001 |
| Cyanosis scores | 0.53±0.53 | 0.70±0.61 | -0.18 | -0.31, -0.04 | -2.58 | 0.01 |
| CAT total scores | 9.81±5.04 | 12.56±5.75 | -2.74 | -4.01, -1.47 | -4.25 | ＜0.001 |
| **SF-36 scores** | 120.84±12.92 | 109.24±15.67 | 11.60 | 8.23. 14.97 | 6.78 | ＜0.001 |
| PF | 73.07±15.65 | 64.03±18.74 | 9.04 | 4.99, 13.09 | 4.39 | ＜0.001 |
| RP | 56.67±40.66 | 35.00±41.08 | 21.67 | 12.04, 31.29 | 4.43 | ＜0.001 |
| BP | 85.16±19.41 | 84.63±20.28 | 0.52 | -4.16, 5.20 | 0.22 | 0.83 |
| GH | 60.56±14.15 | 45.92±18.51 | 14.64 | 10.78, 18.50 | 7.47 | ＜0.001 |
| VT | 74.56±12.10 | 67.52±14.21 | 7.04 | 3.94, 10.14 | 4.47 | ＜0.001 |
| SF | 93.24±16.64 | 79.91±25.87 | 13.33 | 8.24, 18.41 | 5.16 | ＜0.001 |
| RE | 75.31±35.02 | 57.01±39.27 | 18.30 | 9.56, 27.04 | 4.12 | ＜0.001 |
| MH | 78.79±12.13 | 69.77±13.86 | 9.02 | 5.96, 12.08 | 5.80 | ＜0.001 |
| HT | 75.19±18.95 | 58.45±22.29 | 16.74 | 11.88, 21.59 | 6.79 | ＜0.001 |
| mCOPD-PRO total scores | 1.05±0.42 | 1.49±0.57 | -0.45 | -0.57, -0.33 | -7.50 | ＜0.001 |
| mESQ-COPD total scores | 1.48±0.48 | 1.55±0.57 | -0.06 | -0.19, 0.06 | -0.97 | 0.06 |
| **Lung function** |  |  |  |  |  |  |
| FEV 1— L | 0.93±0.35 | 0.93±0.35 | -0.01 | -0.08, 0.08 | -0.05 | 0.96 |
| FVC— L | 2.17±0.72 | 2.22±0.61 | 0.08 | -0.20, 011 | -0.57 | 0.57 |
| FEV1%—% | 34.00±11.30 | 34.69±10.21 | -0.72 | -3.22, 1.79 | -0.53 | 0.57 |

*Acute exacerbation(AE) is characterized by worsening symptoms that require additional medication treatment for COPD patients. In this study, annual numbers of AEs are lower in experimental group than that in control group significantly after treatment based on PP data analysis. The results indicate that, BYGs could reduce the annual numbers of AEs for COPD patients.

**Table S2. Comparison of Inter-group Differences based on ITT data for Each Outcome After Treatment**

| Outcomes | Experimental group(n=160) | Control group  (n=164) | Mean differences | 95%CI | t/*χ2/F* | P |
| --- | --- | --- | --- | --- | --- | --- |
| Annual numbers of acute exacerbation(AE)* | 0.40±0.78 | 0.83±1.24 | -0.43 | -0.66, -0.20 | -3.74 | ＜0.001 |
| Annual numbers of AE related hospitalization | 0.24±0.65 | 0.45±0.79 | -0.18 | -0.37, -0.05 | -2.59 | 0.01 |
| Durations of AE related hospitalizations | 1.61±3.83 | 3.60±5.73 | -1.83 | -3.06, -0.93 | -3.68 | ＜0.001 |
| mMRC Scores | 1.34±0.82 | 1.83±0.82 | -0.49 | -0.67, -0.31 | -5.36 | ＜0.001 |
| 6MWD—m | 413.22±92.26 | 378.27±88.07 | 34.94 | 15.23, 54.65 | 3.49 | 0.001 |
| Total Symptoms scores total scors | 6.56±2.31 | 8.34±3.12 | -1.78 | -2.38, -1.18 | -5.85 | ＜0.001 |
| Cough scores | 0.88±0.64 | 1.18±0.68 | -0.30 | -0.44, -0.15 | -4.08 | ＜0.001 |
| Expectoration scores | 0.98±0.51 | 1.29±0.61 | -0.31 | -0.44, -0.19 | -5.06 | ＜0.001 |
| Gasp scores | 1.23±0.58 | 1.48±0.59 | -0.25 | -0.38, -0.12 | -3.87 | 0.001 |
| Chest tightness scores | 1.00±0.62 | 1.23±0.72 | -0.23 | -0.38, -0.09 | -3.12 | 0.002 |
| Shortness of breath scores | 1.05±0.47 | 1.37±0.67 | -0.32 | -0.44,-0.19 | -4.99 | ＜0.001 |
| Weakness scores | 0.79±0.57 | 1.12±0.66 | -0.33 | -0.47, -0.20 | -4.89 | ＜0.001 |
| Cyanosis scores | 0.53±0.51 | 0.68±0.60 | -0.15 | -0.27, -0.02 | -2.36 | 0.02 |
| CAT total scores | 9.89±4.88 | 12.41±5.74 | -2.52 | -3.69, -1.36 | -4.27 | ＜0.001 |
| **SF-36 scores** | 120.10±12.76 | 109.72±16.32 | 10.37 | 7.17. 13.57 | 6.38 | ＜0.001 |
| PF | 72.44±15.59 | 64.30±20.29 | 8.14 | 4.19, 12.09 | 4.05 | ＜0.001 |
| RP | 55.50±38.91 | 36.33±41.92 | 19.16 | 10.32, 28.01 | 4.26 | ＜0.001 |
| BP | 85.29±18.60 | 84.14±20.35 | 1.15 | -3.11, 5.42 | 0.53 | 0.60 |
| GH | 59.35±14.50 | 46.89±18.33 | 12.45 | 8.85, 16.06 | 6.79 | ＜0.001 |
| VT | 74.40±11.42 | 67.74±14.20 | 6.66 | 3.84, 9.47 | 4.66 | ＜0.001 |
| SF | 92.68±17.46 | 80.69±25.84 | 11.99 | 7.18, 16.80 | 4.90 | ＜0.001 |
| RE | 73.89±34.52 | 57.18±40.52 | 16.71 | 8.49, 24.93 | 4.00 | ＜0.001 |
| MH | 78.10±11.84 | 69.98±14.31 | 8.12 | 5.25, 10.98 | 5.57 | ＜0.001 |
| HT | 73.85±19.09 | 60.11±22.54 | 13.74 | 9.18, 18.30 | 5.93 | ＜0.001 |
| mCOPD-PRO total scores | 1.93±0.75 | 1.99±0.78 | -0.06 | -0.23, 0.11 | -0.72 | 0.47 |
| mESQ-COPD total scores | 1.34±0.40 | 1.63±0.48 | -0.29 | -0.38, -0.19 | -5.81 | ＜0.001 |
| **Lung function** |  |  |  |  |  |  |
| FEV 1— L | 0.93±0.34 | 0.93±0.29 | -0.01 | -0.06, 0.07 | 0.14 | 0.89 |
| FVC— L | 2.16±0.68 | 2.18±0.55 | -0.03 | -0.16, 0.11 | -0.37 | 0.71 |
| FEV1%—% | 34.30±11.03 | 34.76±9.80 | -0.46 | -2.74, 1.82 | 0.40 | 0.70 |

*Acute exacerbation(AE) is characterized by worsening symptoms that require additional medication treatment for COPD patients. In this study, annual numbers of AEs are also lower in experimental group than that in control group significantly after treatment based on ITT data analysis. The results indicate that, BYGs could reduce the annual numbers of AEs for COPD patients.
